# Supplementary material for: Conformational selection of the intrinsically disordered plant stress protein COR15A in response to solution osmolarity – an X-ray and light scattering study
Source: Royal Society of Chemistry journal article supplement (doi:10.1039/c9cp01768b), 2019-01-01
Supplement: c9cp01768b1.pdf [file c9cp01768b1.pdf]

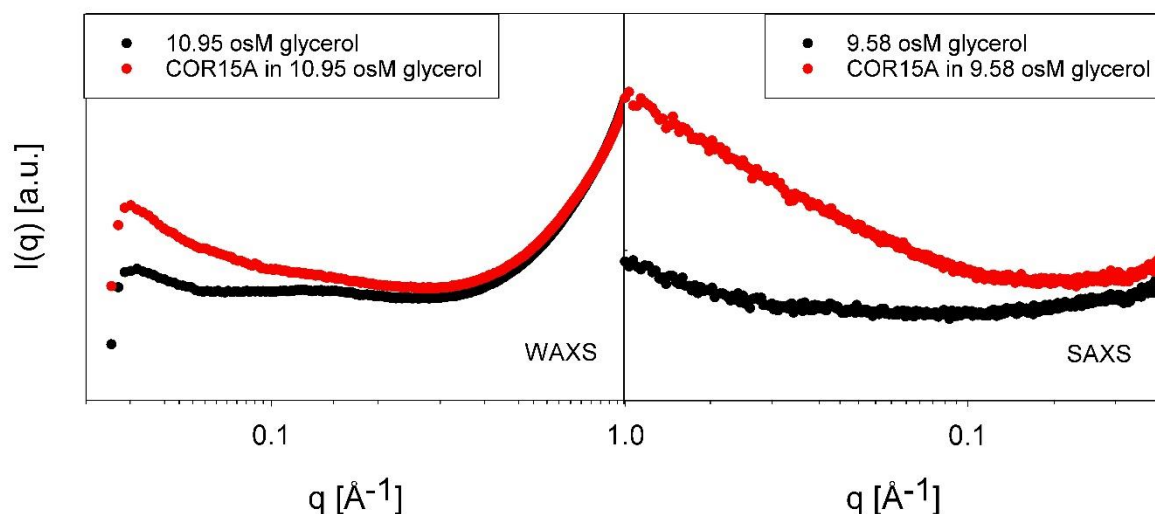

**SI figure I:** X-ray scattering data of high osmolarity samples in the presence and absence of COR15A in log-log representation. WAXS data at 10.95 osM glycerol are shown in the left panel and SAXS data at 9.58 osM glycerol are shown in the right panel.

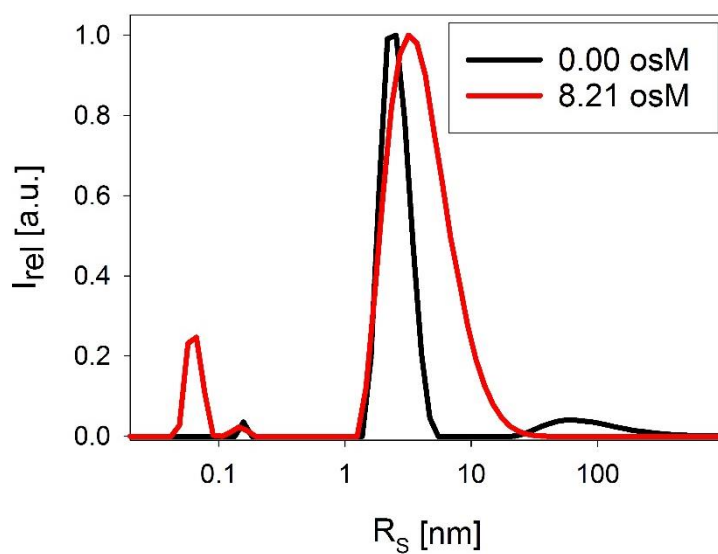

**SI figure II:** Size distributions of COR15A from DLS measurements in 0.00 osM (black) and 8.21 osM glycerol (red) at protein concentrations of 4 g/L and 8 g/L, respectively. Size distributions are adjusted for solvent viscosities.

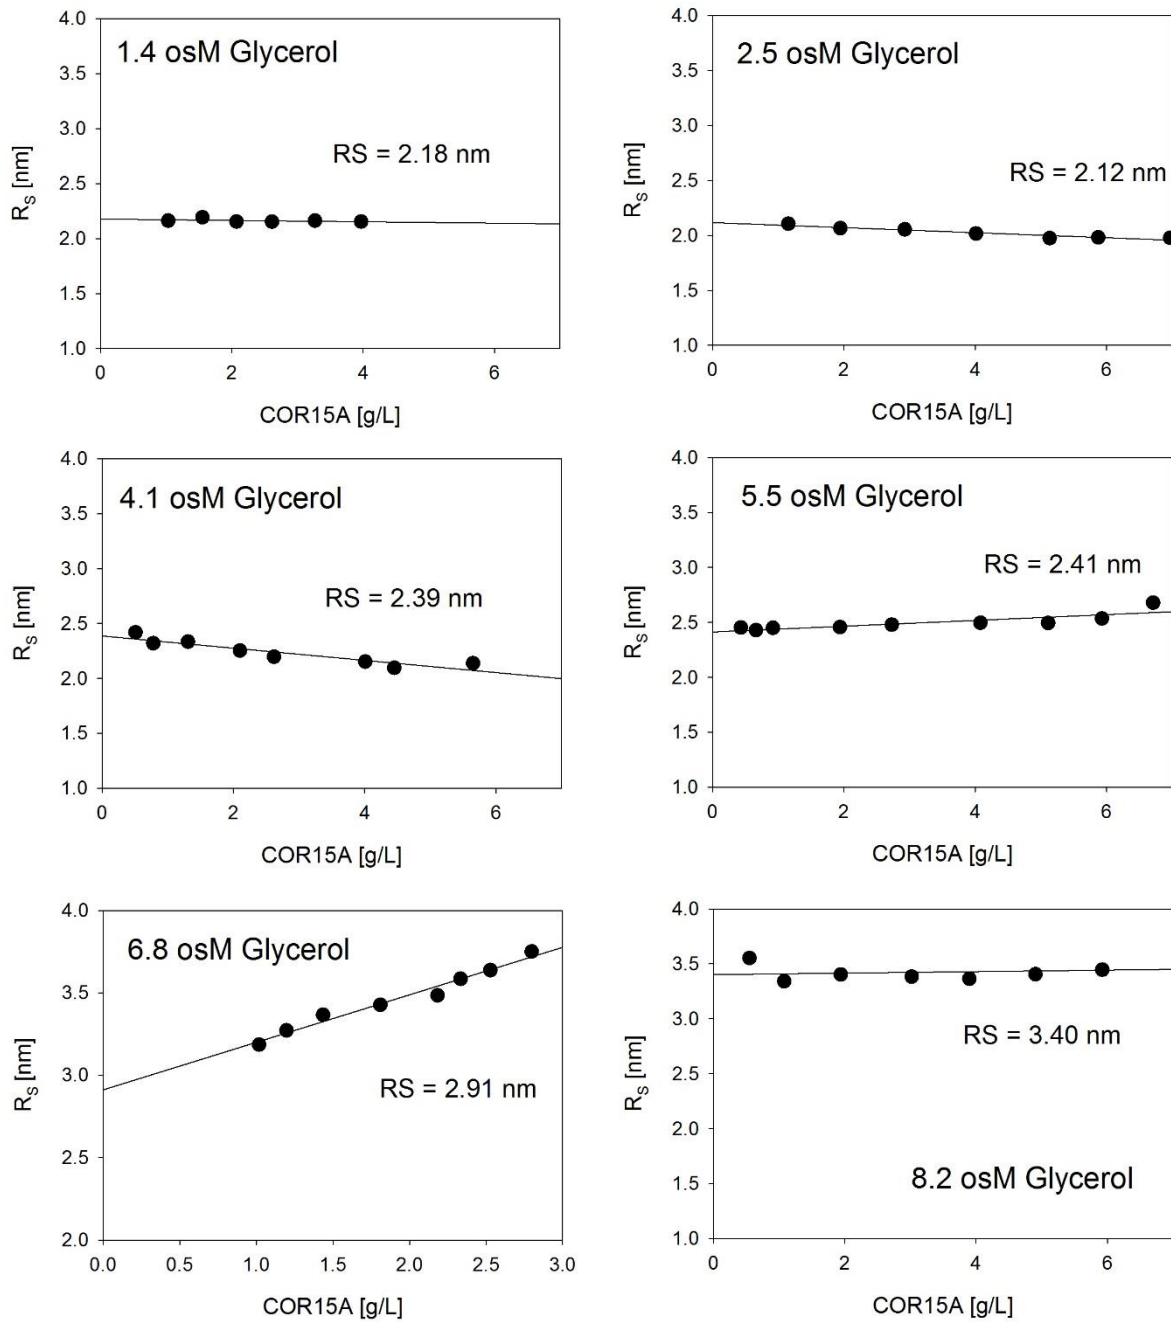

**SI figure III:** Apparent  $R_s$  from DLS as a function of COR15A concentration in all measured glycerol concentrations.  $R_s$  after extrapolation to infinite dilution is indicated.

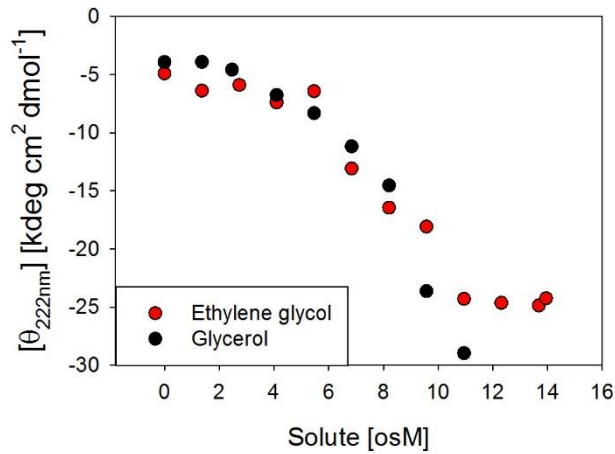

**SI figure IV:** Far-UV CD signal of COR15A in response to increasing concentrations of glycerol and EG, plotted as MRW ellipticity at 222nm as a function of osmolarity

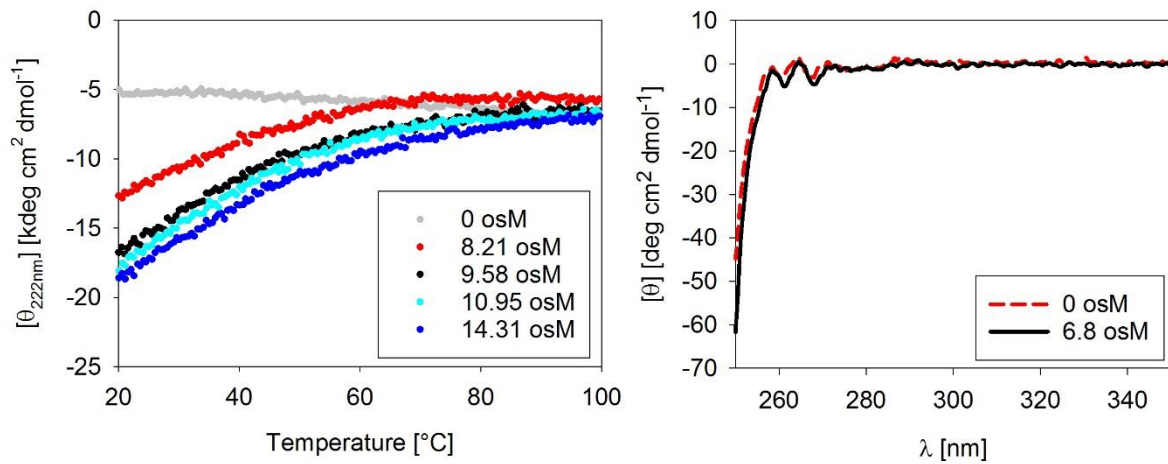

**SI figure V:** Far-UV CD melting curves of COR15A at 0 osM and at different high EG concentrations, plotted as MRW ellipticity at 222nm as a function of temperature (A). Near-UV CD spectra of COR15A without glycerol (red) and with 6.8 M glycerol (black).
